# Supplementary material for: Adipose tissue–specific ablation of Ces1d causes metabolic dysregulation in mice
Source: PubMed Central journal article supplement (PMC9034061; doi:10.26508/lsa.202101209), 2022-04-22

Raw images of immunoblots in Fig 1A

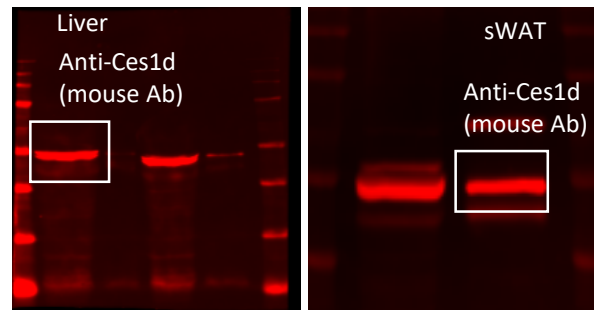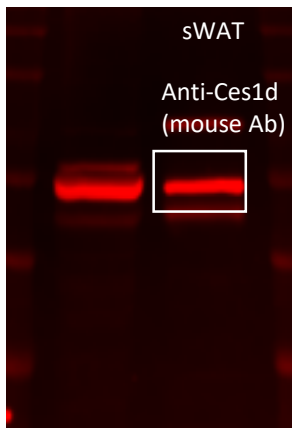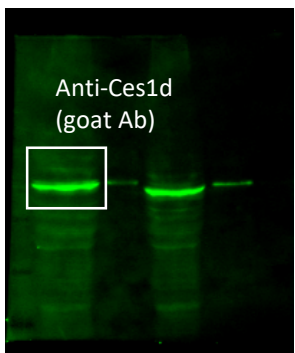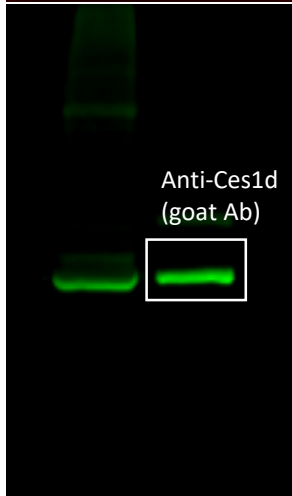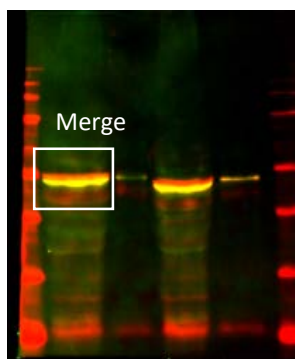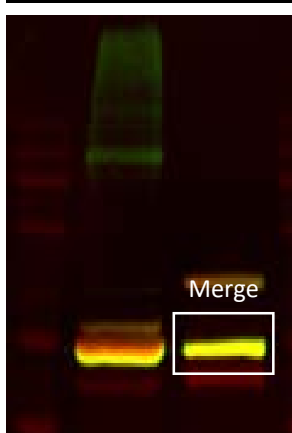

Raw images of immunoblots in Fig 1C

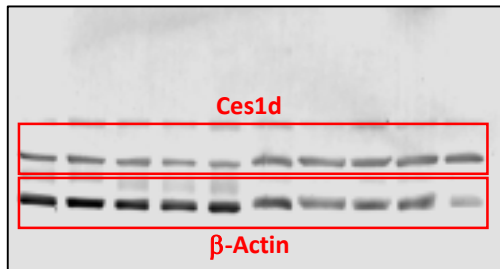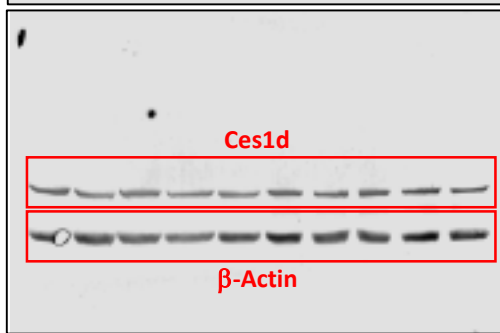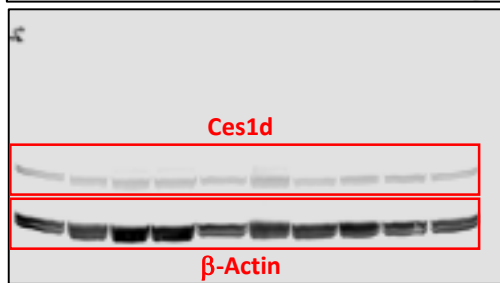

Raw images of immunoblots in Fig 1N-2

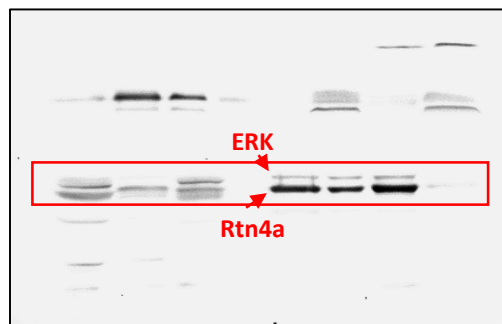

Raw images of immunoblots in Fig 1E

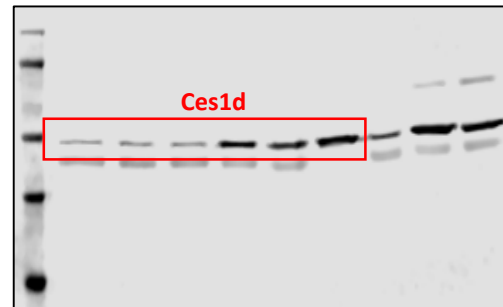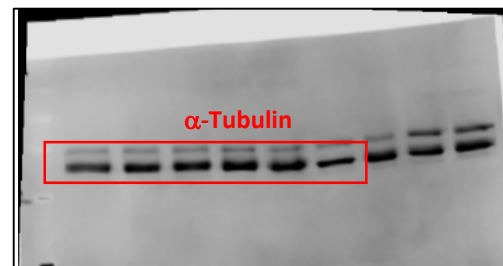

Raw images of immunoblots in Fig 1L

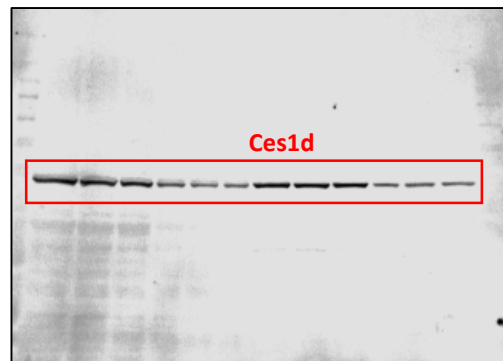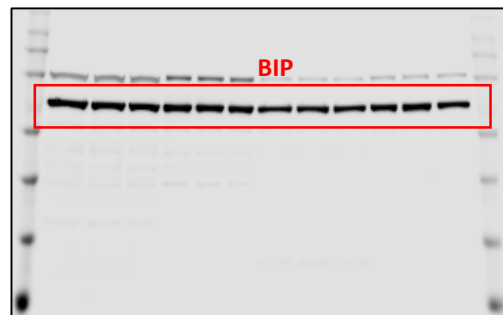

Raw images of immunoblots in Fig 1P

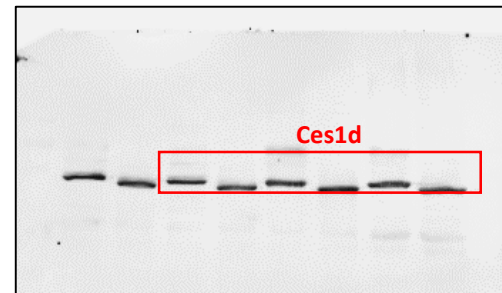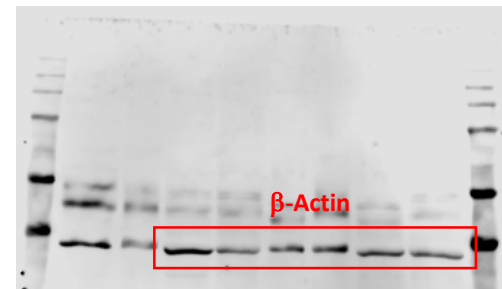

Raw images of immunoblots in Fig 1N-1

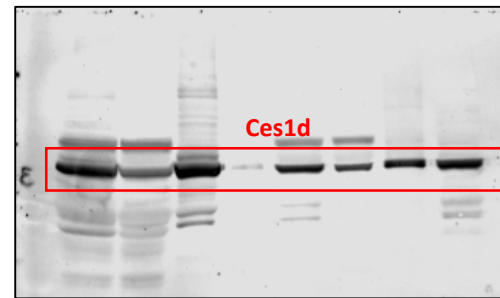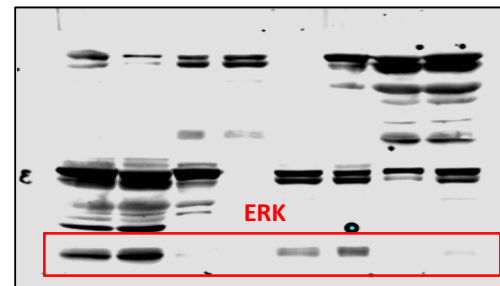

Supplement: LSA-2021-01209_SdataF1.pdf [file LSA-2021-01209_SdataF1.pdf]
