# Supplementary material for: Adipose tissue–specific ablation of Ces1d causes metabolic dysregulation in mice
Source: PubMed Central journal article supplement (PMC9034061; doi:10.26508/lsa.202101209), 2022-04-22
Supplement: LSA-2021-01209_SdataF8.pdf [file LSA-2021-01209_SdataF8.pdf]

Raw images of immunoblots in Fig 8B

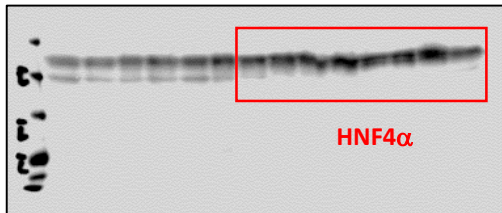

HNF4 $\alpha$

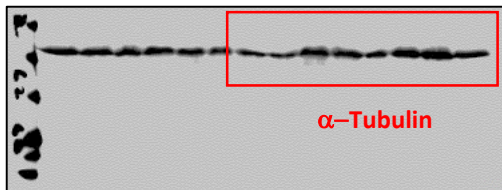

$\alpha$ -Tubulin

Raw images of immunoblots in Fig 8G

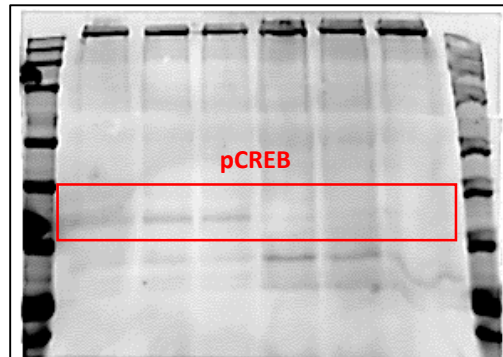

pCREB

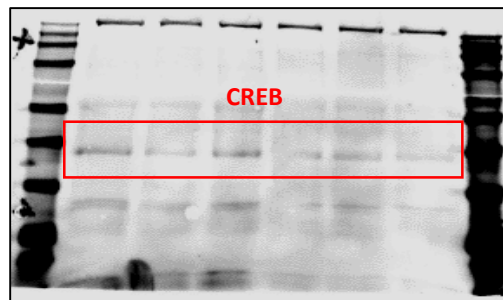

CREB

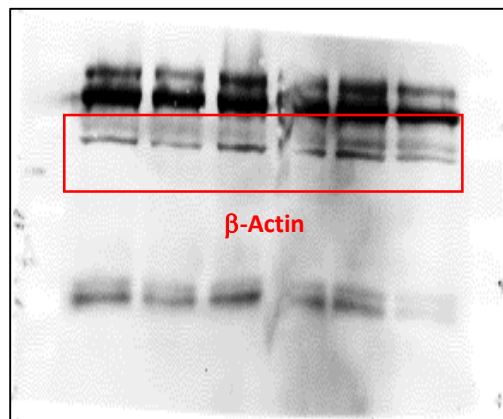

$\beta$ -Actin

Raw images of immunoblots in Fig 8I

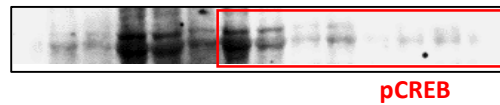

pCREB

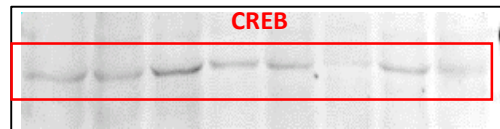

CREB

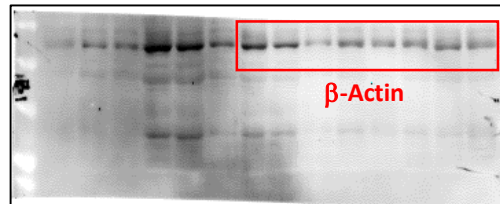

$\beta$ -Actin

Raw images of immunoblots in Fig 8K

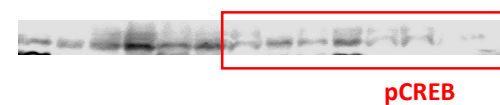

pCREB

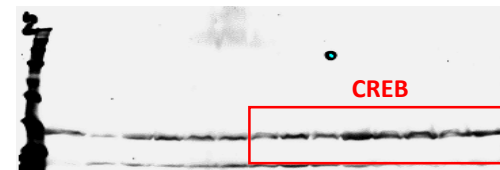

CREB

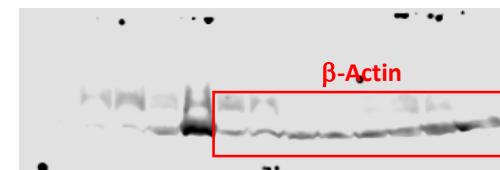

$\beta$ -Actin
