# Supplementary material for: Adipose tissue–specific ablation of Ces1d causes metabolic dysregulation in mice
Source: PubMed Central journal article supplement (PMC9034061; doi:10.26508/lsa.202101209), 2022-04-22

Raw images of immunoblots in FigS2A

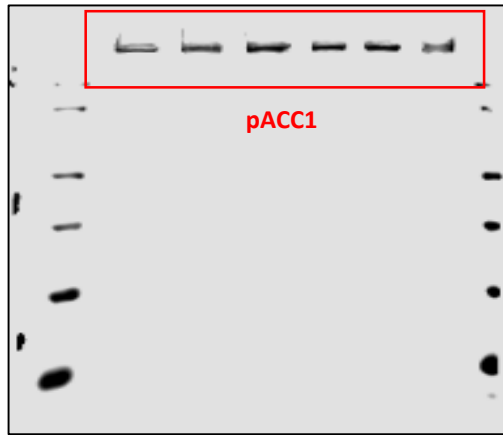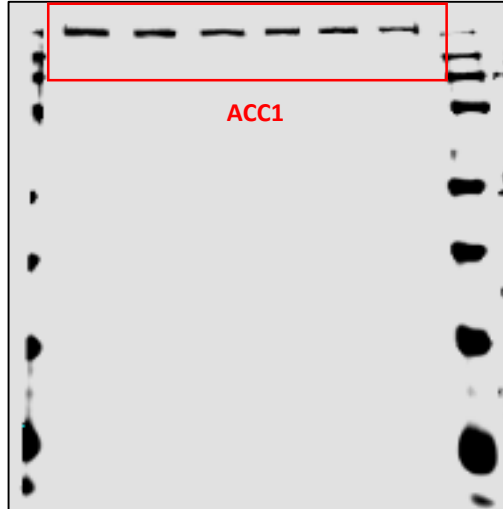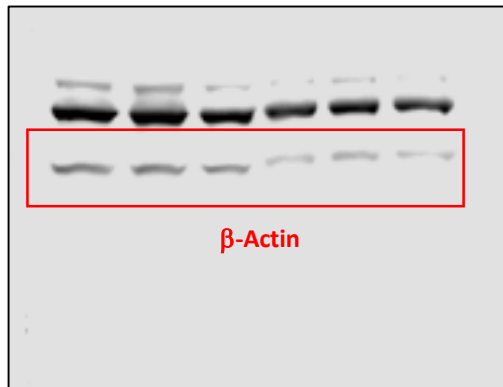

Raw images of immunoblots in FigS2C

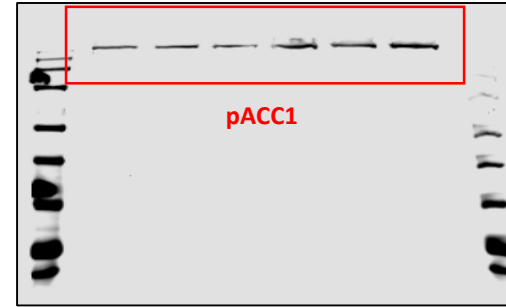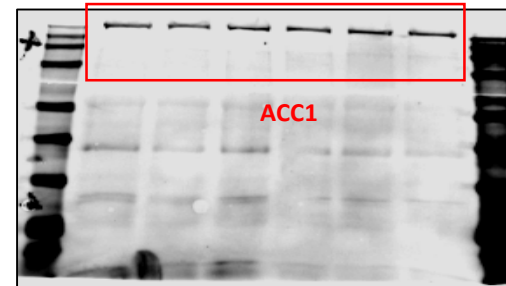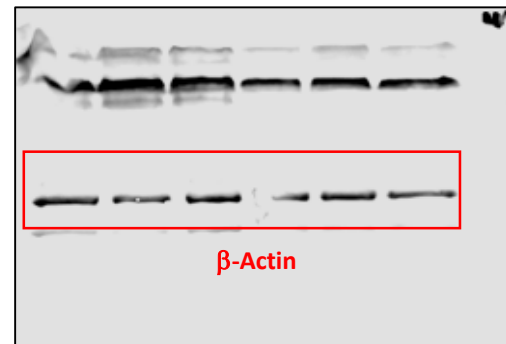

Raw images of immunoblots in FigS2E

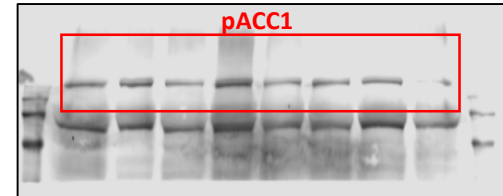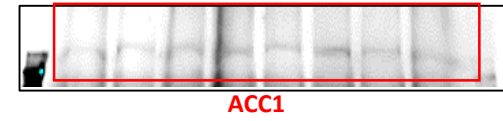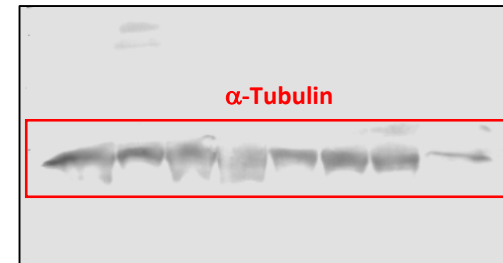

Raw images of immunoblots in FigS2G

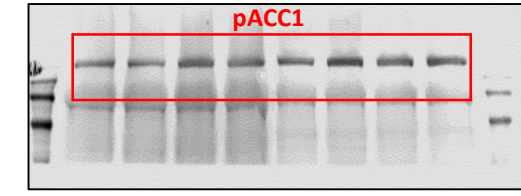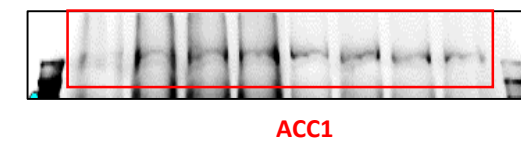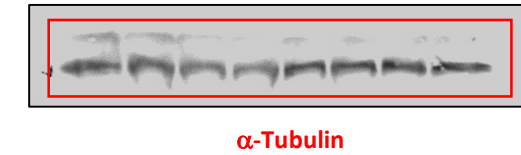

Supplement: LSA-2021-01209_SdataFS2.pdf [file LSA-2021-01209_SdataFS2.pdf]
