# Supplementary material for: Adipose tissue–specific ablation of Ces1d causes metabolic dysregulation in mice
Source: Life Sci Alliance. 2022 Apr 22;5(8):e202101209. doi: 10.26508/lsa.202101209 (PMC9034061; doi:10.26508/lsa.202101209)
Supplement: Supplementary file 10 [file LSA-2021-01209_TableS3.docx]

Table S3: qPCR Primers

| Gene Name | Species | Sense Sequence (5' to 3') | Antisense Sequence (5' to 3) | Reference |
| --- | --- | --- | --- | --- |
| Creb1 | Mouse | CCAGTCTCCACAAGTCCAAACAG | GGCACTGTTACAGTGGTGATGG | 12 |
| Ces1d | GGAGAGTCAGCAGGAGGTTTC | GAGGGACACACCACTCTCAG | 93 |
| Pnpla2 | ACCACCCTTTCCAACATGCTA | GGCAGAGTATAGGGCACCA |
| Lipe | TGGCACACCATTTTGACCTG | TTGCGGTTAGAAGCCACATAG |
| Mgll | ACCATGCTGTGATGCTCTCTG | CAAACGCCTCGGGGATAACC |
| Plin1 | CGTGTAGTGTGGGGTCCTT | GGGCCCTTGTTCATTGACATC |
| Acaca | GATGAACCATCTCCGTTGGC | GACCCAATTATGAATCGGGAGTG |
| Fasn | GGAGGTGGTGATAGCCGGTAT | TGGGTAATCCATAGAGCCCAG |
| Scd1 | AGATCTCCAGTTCTTACACGACCAC | GACGGATGTCTTCTTCCAGGTG |
| Pdgfra | CAA ACC CTG AGA CCA CAA TG | TCC CCC AAC AGT AAC CCA AG |
| Pdgfrb | TGC CTC AGC CAA ATG TCA CC | TGC TCA CCA CCT CGT ATT CC |
| Zfp423 | GAGCCAGCACGCACAGTGAG | GCACACTAGCTGGAGCAGGAC |
| Dlk1 | CAGTGCATCTGCAAGGATGGCTG | CTTGTGCTGGCAGTCCTTTCCAG |
| Col1a1 | GTGCTCCTGGTATTGCTGGT | GGCTCCTCGTTTTCCTTCTT |
| Col3a1 | GGGTTTCCCTGGTCCTAAAG | CCTGGTTTCCCATTTTCTCC |
| Col6a3 | GATGAGGGTGAAGTGGGAGA | CAGCACGAAGAGGATGTCAA |
| Lox | CCACAGCATGGACGAATTCA | AGCTTGCTTTGTGGCCTTCA |
| Tlr4 | ATGGCATGGCTTACACCACC | GAGGCCAATTTTGTCTCCACA |
| Tnfa | CACGTCGTAGCAAACCACCAAGTGGA | TGGGAGTAGACAAGGTACAACCC |
| Adgre1 | CTTTGGCTATGGGCTTCCAGTC | GCAAGGAGGACAGAGTTTATCGTG |
| Il1b | CAACCAACAAGTGATATTCTCCATG | GATCCACACTCTCCAGCTGCA |
| Cd86 | TGTTTCCGTGGAGACGCAAG | TTGAGCCTTTGTAAATGGGCA |
| Cd163 | TCCACACGTCCAGAACAGTC | CCTTGGAAACAGAGACAGGC |
| Cd206 | CTCTGTTCAGCTATTGGACGC | CGGAATTTCTGGGATTCAGCTTC |
| Nfkb1 | ATG GCA GAC GAT GAT CCC TAC | TGT TGA CAG TGG TAT TTC TGG TG |
| Clec4e | CTT CGG GGA AGC AAC AAC TC | CAA GCA ACT GCA CCA GAG AAC |
| ß-Actin | GGC ACC ACA CCT TCT ACA ATG | GGG GTG TTG AAG GTC TCA AAC |
